# Supplementary material for: Synthesis, characterization, and comparison of antibacterial effects and elucidating the mechanism of ZnO, CuO and CuZnO nanoparticles supported on mesoporous silica SBA-3
Source: Royal Society of Chemistry journal article supplement (doi:10.1039/c9ra09829a), 2020-01-01
Supplement: c9ra09829a1.pdf [file c9ra09829a1.pdf]

## Supporting Information

Songfa Qiu, Hongjun Zhou,\* Zhichuan Shen, Li Hao, Huayao Chen, Xinhua Zhou\*

Key Laboratory of Agricultural Green Fine Chemicals of Guangdong Higher Education Institution, School of Chemistry and Chemical Engineering, Zhongkai University of Agriculture and Engineering, Guangzhou, People's Republic of China

\* Hongjun Zhou, E-mail: hongjunzhou@163.com

\* Xinhua Zhou, E-mail: cexinhuazhou@163.com

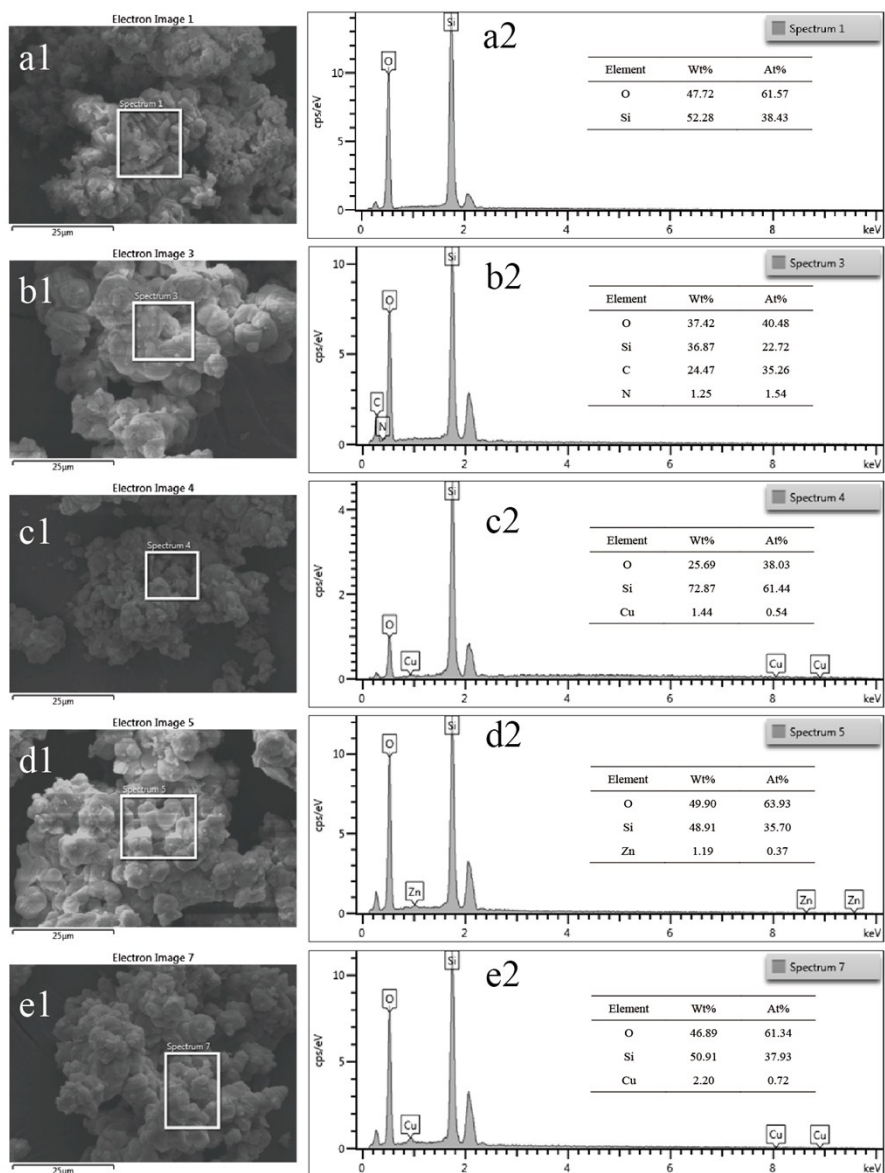

Figure S1. energy dispersive X-ray spectroscopy (EDS) of SBA - 3(a1, a2); G - SBA(b1, b2); SBA/CuO (c1, c2); SBA/ZnO (d1, d2) and SBA/CuZnO (e1, e2)
